# Supplementary material
Source: PubMed Central journal article supplement (PMC2040878)

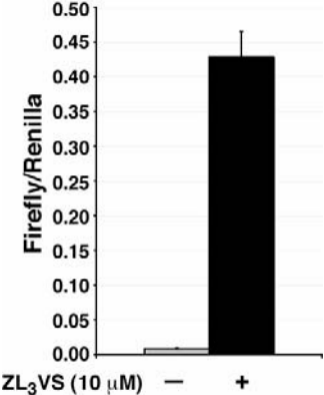

Supplement: pnas_0700816104_1.pdf [file pnas_0700816104_1.pdf]

**A**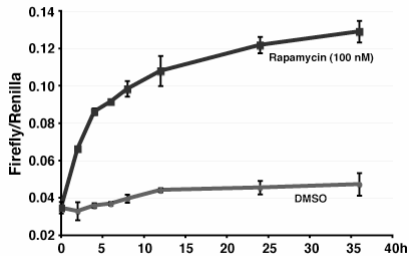**B**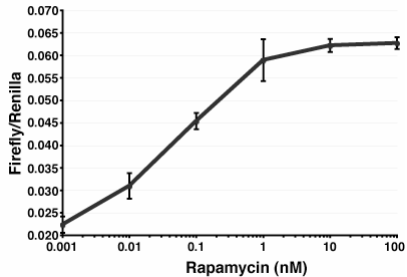**C**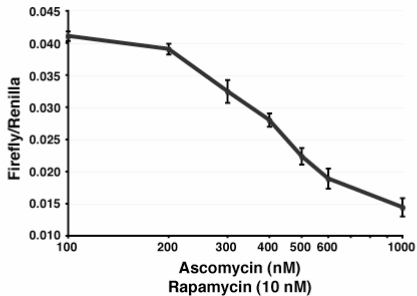

Supplement: pnas_0700816104_2.pdf [file pnas_0700816104_2.pdf]

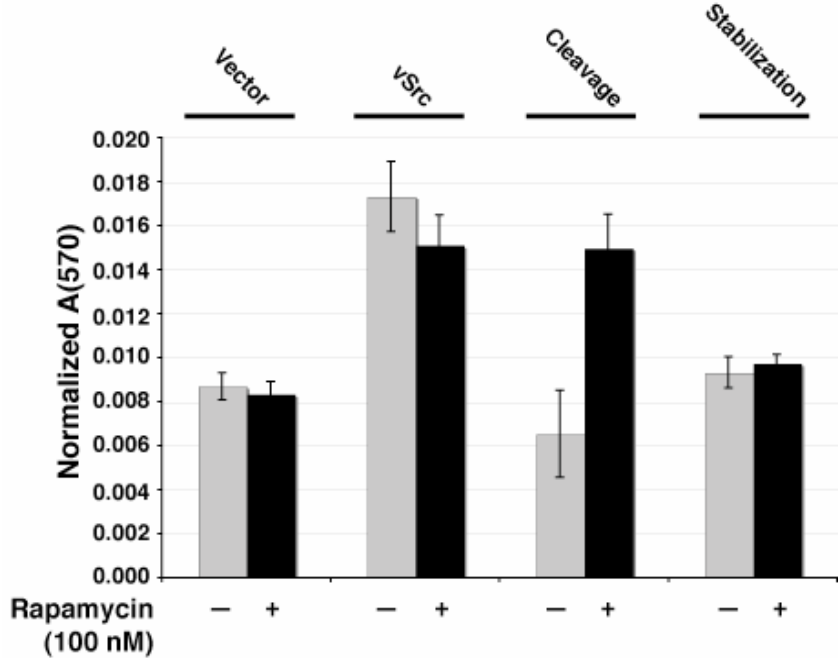

Supplement: pnas_0700816104_3.pdf [file pnas_0700816104_3.pdf]

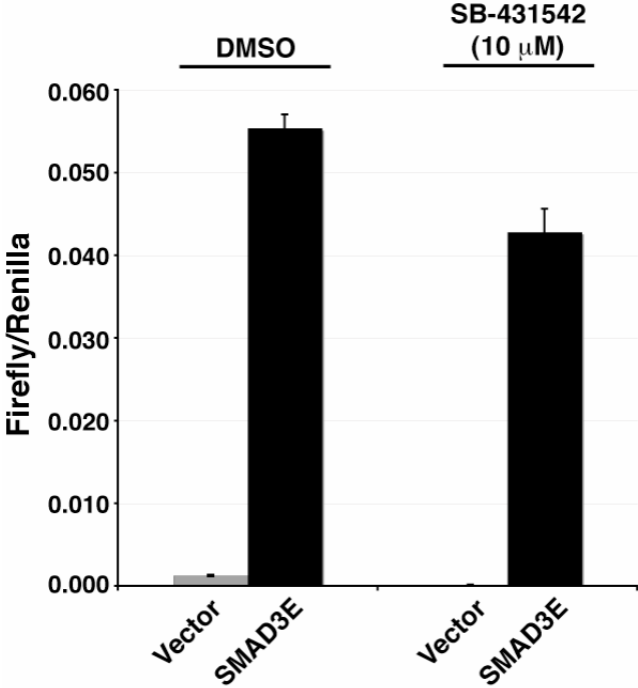

Supplement: pnas_0700816104_4.pdf [file pnas_0700816104_4.pdf]

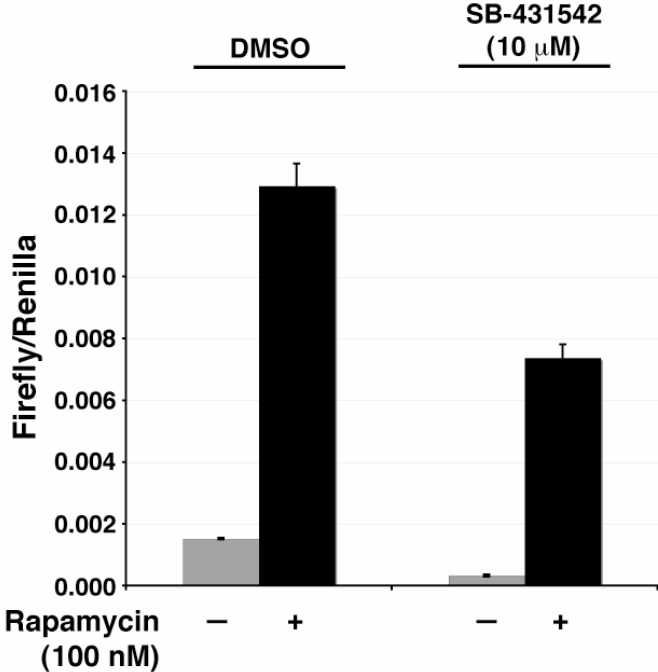

Supplement: pnas_0700816104_5.pdf [file pnas_0700816104_5.pdf]
